# Supplementary material
Source: publisher figshare collection journal article supplement (https://acs.figshare.com/ndownloader/files/5732175)
Supplement: Supplementary file 1 [file 5732175]

# Highly Enantioselective Copper-Bisoxazoline Catalyzed Allylic Oxidation of Cyclic olefins with *tert*-Butyl *p*-Nitroperbenzoate

Merritt B. Andrus\* and Ziniu Zhou

Brigham Young University, Department of Chemistry and Biochemistry,  
C100 BNSN, Provo, UT 84602-5700, USA

## Experimental Section

**General Methods.** Melting points were determined using a LD Meltemp II and are uncorrected. Optical rotations were recorded using a Perkin-Elmer 241 MC Polarimeter in CHCl<sub>3</sub>. The  $[\alpha]_D$  values are given in 10<sup>-1</sup> deg cm<sup>2</sup> g<sup>-1</sup>. The NMR spectra were recorded in CDCl<sub>3</sub> at 300 MHz with chloroform-d<sub>1</sub> ( $\delta$  7.26, <sup>1</sup>H;  $\delta$  77.23, <sup>13</sup>C) as internal standard. The mass spectra were obtained using chemical ionization (CI) or electron impact (EI). Enantiomeric excess of the samples were determined by HPLC using a Chiralpak<sup>®</sup> AD<sup>TM</sup> and/or Chiralcel<sup>®</sup> OD-H columns. All reactions were performed under an atmosphere of oxygen-free nitrogen in flame-dried glassware twice evacuated and filled with nitrogen. *t*-butyl-*p*-nitroperbenzoate was made according to the procedure below. Olefins were distilled from calcium hydride and passed through activated alumina immediately before use. Solvents and solutions were transferred by syringe-septum and cannula techniques. All solvents for the reactions were of reagent grade and were dried and distilled immediately before use as follows: acetonitrile dichloromethane, pyridine, and triethylamine from calcium hydride; tetrahydrofuran (THF) from sodium/benzophenone ketyl. The organic extracts were dried over anhydrous sodium sulfate. Evaporation of the solvents was performed in reduced pressure. Yields are given for isolated products showing one spot on a TLC plate and no impurities were detectable in the NMR spectrum. Starting materials and reagents were purchased from Aldrich. Purification by radial chromatography was performed using 1 and/or 2 mm plates loaded with 230 - 400 mesh PF<sub>254</sub> gypsum-bound silica.

### Procedure for the Synthesis of *tert*-Butyl *p*-nitroperbenzoate:

CAUTION! Peroxy compounds present a serious detonation hazard. While peresters are not nearly as reactive as peracids, use of a blast shield and a teflon coated spatula for solid materials are recommended. A teflon needle was used for transferring all *tert*-butyl hydroperoxide solutions.

***tert*-Butyl *p*-nitroperbenzoate:** To a clear solution of *p*-nitrobenzoyl chloride (3.2 g, 17.2 mmol) in CH<sub>2</sub>Cl<sub>2</sub> (35 mL) at -20 °C under N<sub>2</sub> was added pyridine (1.7 mL, 20.0 mmol). The reaction solution was stirred for 10 min. *tert*-Butyl hydroperoxide (5-6 M in nonane, 3.5 mL, 20.0 mmol) was added dropwise to the solution at -20 °C, and the reaction was stirred for 4 h. The reaction solution was diluted with CH<sub>2</sub>Cl<sub>2</sub> (20 mL), and washed with water. The organic layer was separated, dried over MgSO<sub>4</sub>, and evaporation of the solvent afforded crude yellow solid residue. Purification using flash chromatography (2-10% EtOAc/hexanes) afforded the desired product as a light yellow solid (mp 75-77 °C, 3.9g, 98% yield). <sup>1</sup>H NMR (200 MHz, CDCl<sub>3</sub>)  $\delta$  8.35 (d, 2H), 8.15 (d, 2H), 1.45 (s, 9H); <sup>13</sup>C NMR (50 MHz, CDCl<sub>3</sub>)  $\delta$  162.3, 150.1, 133.2, 130.4, 123.9, 84.8, 26.3.

**General Procedure for Enantioselective Allylic Oxidation of cycloolefins with *t*-butyl-*p*-nitroperbenzoate in the presence of bisoxazoline ligand -  $\text{Cu}(\text{CH}_3\text{CN})_4\text{PF}_6$**  A solution of the bisoxazoline ligand (0.13 mmol) and  $\text{Cu}(\text{CH}_3\text{CN})_4\text{PF}_6$  (0.048 g, 0.13 mmol) in distilled acetonitrile (3.0 mL) was stirred at rt for 2 h (until TLC indicated that there was no free ligand present). The solution was cooled to - 25 °C to - 30 °C, followed by the addition of cycloolefin (4.3 mmol) and *t*-butyl-*p*-nitroperbenzoate (0.203 g, 0.85 mmol) sequentially. The solution was degassed by nitrogen and stirred at - 20 °C for 8 to 10 days typically. The reaction was monitored by TLC during this reaction period. After the reaction was judged to be complete, the acetonitrile was removed by *vacuo*, and the crude material was dissolved in 10%  $\text{NH}_4\text{OH}$ , extracted with ether and the organic layer was dried over  $\text{Na}_2\text{SO}_4$ . Radial chromatography using ethyl acetate/hexanes (2-10%) was used to purify the products.

**2-Cyclopentenyl-*p*-nitrobenzoate.** mp 81- 83 °C.  $^1\text{H}$  NMR (300 MHz,  $\text{CDCl}_3$ )  $\delta$  8.28 (bt, 2H), 8.20 (bt, 2H), 6.21 (m, 1H), 5.99-5.94 (m, 2H), 2.65-2.58 (m, 1H), 2.48-2.36 (2H), 2.05-1.96 (m, 1H).  $^{13}\text{C}$  NMR (300 MHz,  $\text{CDCl}_3$ )  $\delta$  164.8, 150.4, 138.8, 136.3, 130.9, 128.9, 123.7, 82.6, 31.4, 30.0. MS (EI), *m/z* (%) 233 (10,  $\text{M}^{+}$ ), 150 (100,  $\text{C}_7\text{H}_4\text{NO}_3$ ), 104 (22), 84 (58), 67 (83,  $\text{C}_5\text{H}_7$ ). Obtained as a white solid in 99% ee (entry 6, table 2). The optical purity was determined by HPLC using a Chiralcel OD-H column. [hexane/MTBE 90:10; flow rate 0.5 ml/min;  $t_R$  = 18.80 min (*R*), 21.20 min (*S*): (82% ee sample)  $[\alpha]_D^{25}$  - 169.7° (c 0.38,  $\text{CHCl}_3$ ) [lit.<sup>1</sup> 2-cyclopentenyl-1-benzoate (93% ee);  $[\alpha]_D^{25}$  - 179.0° (c 0.37,  $\text{CHCl}_3$ )].

**2-Cyclohexenyl-*p*-nitrobenzoate.** mp 75 - 76 °C.  $^1\text{H}$  NMR (300 MHz,  $\text{CDCl}_3$ )  $\delta$  8.28 (bt, 2H), 8.22 (bt, 2H), 6.06 (m, 1H), 5.84 (m, 1H), 5.55 (m, 1H), 2.13 - 1.74 (m, 6H).  $^{13}\text{C}$  NMR (300 MHz,  $\text{CDCl}_3$ )  $\delta$  168.9, 155.6, 136.4, 133.9, 130.9, 125.2, 123.7, 70.0, 28.5, 25.1, 19.0. MS (EI), *m/z* (%) 247 (18,  $\text{M}^{+}$ ), 161 (56), 150 (54), 81 (100,  $\text{C}_6\text{H}_9$ ). Obtained as a white solid in 96% ee (entry 2, table 1). The optical purity was determined by HPLC using a Chiralpak AD column. [heptane/2-propanol 99.5 :0.5; flow rate 0.5 ml/min;  $t_R$  = 20.42 min (*R*), 24.27 min (*S*): (78% ee)  $[\alpha]_D^{25}$  - 134.7° (c 0.38,  $\text{CHCl}_3$ ) [lit.<sup>1</sup> 2-cyclohexenyl-1-benzoate (71% ee sample);  $[\alpha]_D^{25}$  - 118.0° (c 0.45,  $\text{CHCl}_3$ )].

**2-Cycloheptenyl-*p*-nitrobenzoate.**  $^1\text{H}$  NMR (300 MHz,  $\text{CDCl}_3$ )  $\delta$  8.28 (m, 2H), 8.22 (m, 2H), 5.97 - 5.88 (m, 1H), 5.80 - 5.76 (bd, 1H), 5.70 - 5.68 (bd, 1H), 2.21 (m, 2H), 2.00 (m, 2H), 1.88 - 1.73 (m, 4H).  $^{13}\text{C}$  NMR (300 MHz,  $\text{CDCl}_3$ )  $\delta$  164.2, 151.0, 136.3, 132.9, 132.8, 130.9, 123.7, 76.1, 32.9, 28.7, 26.8, 26.6. MS (EI), *m/z* (%) 261 (7,  $\text{M}^{+}$ ), 150 (100,  $\text{C}_7\text{H}_4\text{NO}_3$ ), 94 (34,  $\text{C}_7\text{H}_{10}$ ), 84 (67), 79 (58). Obtained as a light yellow oil in 99% ee (entry 3, table 3). The optical purity was determined by HPLC using a Chiralcel OD-H column. [heptane/2-propanol 99.5 :0.5; flow rate 0.5 ml/min;  $t_R$  = 21.65 min (*R*), 25.48 min (*S*): (99% ee sample)  $[\alpha]_D^{25}$  - 63.1° (c 0.65,  $\text{CHCl}_3$ ) [lit.<sup>2</sup> 2-cycloheptenyl-1-benzoate (82% ee)  $[\alpha]_D^{25}$  - 38.2° (c 1,  $\text{CHCl}_3$ )].

**2,6 -Cyclooctadienyl-*p*-nitrobenzoate.** mp 78 - 80 °C.  $^1\text{H}$  NMR (300 MHz,  $\text{CDCl}_3$ )  $\delta$  8.29 (bt, 2H), 8.22 (bt, 2H), 6.23 (m, 1H), 5.79 - 5.58 (m, 4H), 2.94 - 2.83 (m, 2H), 2.64 - 2.50 (m, 2H), 2.38 - 2.21 (m, 2H).  $^{13}\text{C}$  NMR (300 MHz,  $\text{CDCl}_3$ )  $\delta$  170.9, 130.9, 130.1, 128.6, 124.9, 123.7, ??, 74.4, 33.9, 28.8, 28.3, 28.0. MS (EI), *m/z* (%) 273 (7,  $\text{M}^{+}$ ), 150 (100,  $\text{C}_7\text{H}_4\text{NO}_3$ ), 104 (41,  $\text{C}_8\text{H}_8$ ), 84 (51), 78 (33). It was obtained as a white solid in 94% ee (entry 1, table 4). The optical purity was determined by HPLC using a Chiralcel OD-H column. [heptane/2-propanol 99:1; flow rate 1.0 ml/min;  $t_R$  = 13.33 min (*S*), 16.09 min (*R*): (74% ee sample, entry 2)  $[\alpha]_D^{25}$  + 18.5° (c 1,  $\text{CHCl}_3$ )].

**Procedure for Kinetic Resolution Experiment.** Racemic sample of 2-cyclohexenyl-*p*-nitrobenzoate (0.05 g, 0.202 mmol) was added to a solution of the gem-dimethyl diphenyl bisoxazoline ligand (0.0303 mmol, 15 mol%)- CuPF<sub>6</sub> complex (0.0303 mmol) in acetonitrile (2.0 mL) followed by *t*-butyl-*p*-nitroperbenzoate (0.048 g, 0.202 mmol). The reaction mixture was stirred at - 20 °C for 11 d. The product was recovered after work-up in 91% yield following chromatography. No change in the chiral HPLC spectrum was observed. When 58% ee enriched 2-cyclohexenyl-*p*-nitrobenzoate was exposed to these conditions for 17 d, the material was recovered with 85% yield and was found to be further enriched to 84% ee.

**Time Dependence for Reactivity and Selectivity.** For the example in entry 3, table 1:

| Days | Yield (%) | Selectivity (ee%) |
|------|-----------|-------------------|
| 1    | 29        | 70                |
| 3    | 41        | 70                |
| 5    | 44        | 70                |
| 7    | 43        | 73                |
| 9    | 44        | 74                |
| 11   | 45        | 77                |
| 13   | 54        | 88                |
| 15   | 55        | 95                |
| 17   | 55        | 95                |

Aliquots were withdrawn at the indicated times and the yields were estimated from an HPLC integration-concentration calibration curve. The selectivities were directly measured as before.

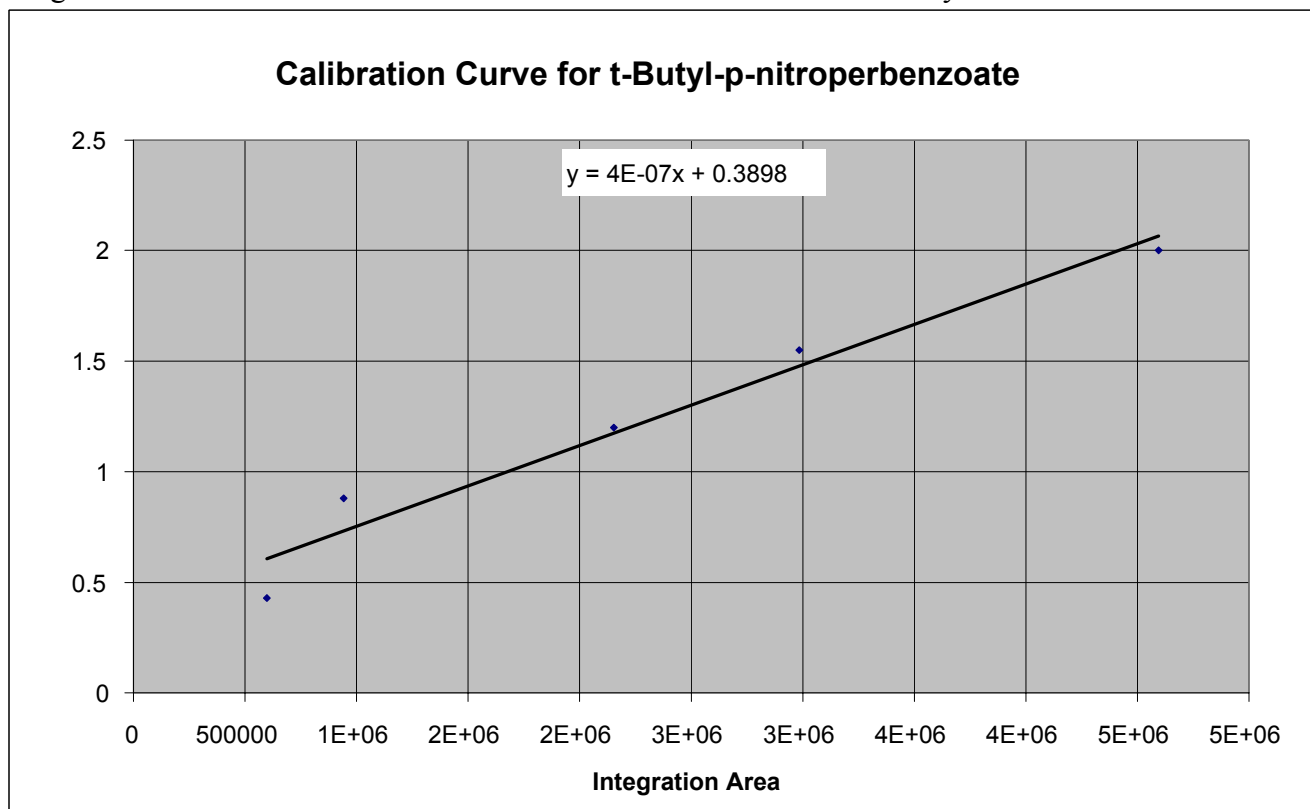

## References

- [1] (a) Kawasaki, K.; Tsumura, S.; Katsuki, T. *Synlett* **1995**, 1245. (b) Kawasaki, K.; Katsuki, T. *Tetrahedron* **1997**, 53, 6337.
- [2] Sekar, G.; DattaGupta, A.; Singh, V. K. *J. Org. Chem.* **1998**, 63, 2961.

Filename: zhou.doc  
Directory: C:\Documents and Settings\mnd96\Desktop  
Template: C:\Documents and Settings\mnd96\Application  
Data\Microsoft\Templates\Normal.dot  
Title: Experimental Section  
Subject:  
Author: M.B. Andrus Lab  
Keywords:  
Comments:  
Creation Date: 6/26/2002 3:06 PM  
Change Number: 2  
Last Saved On: 6/26/2002 3:06 PM  
Last Saved By: pas00  
Total Editing Time: 2 Minutes  
Last Printed On: 6/26/2002 4:21 PM  
As of Last Complete Printing  
Number of Pages: 4  
Number of Words: 1,196 (approx.)  
Number of Characters: 6,818 (approx.)
